# Supplementary material for: Dynamic structural conversion in a spin-crossover cobalt(ii) compound with long alkyl chains
Source: Royal Society of Chemistry journal article supplement (doi:10.1039/b814415j), 2008-01-01
Supplement: b814415j.pdf [file b814415j.pdf]

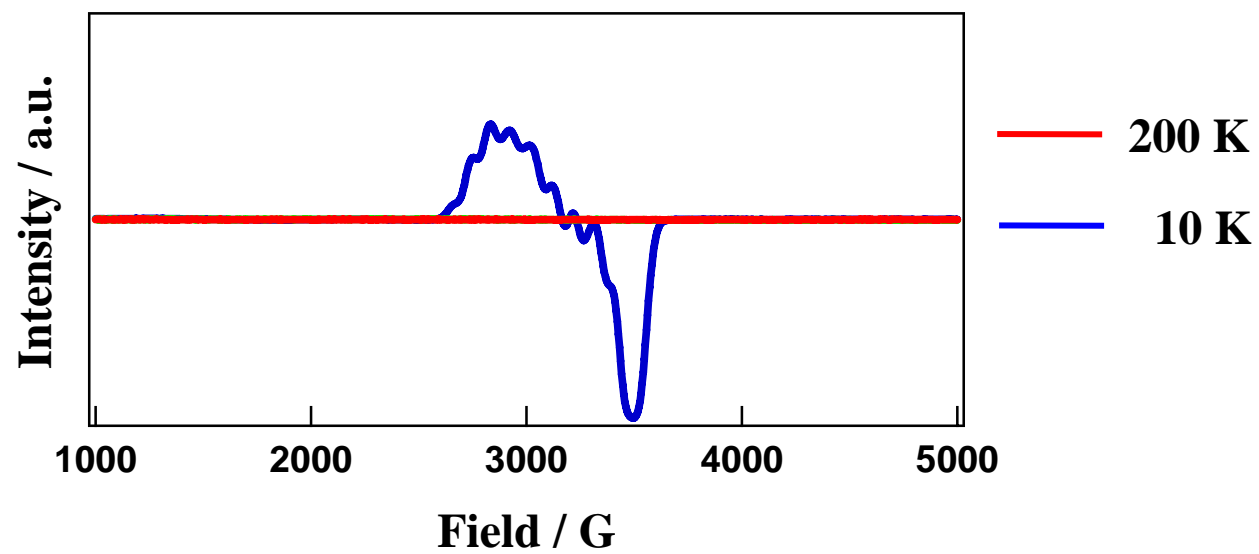

**Figure S1 ESR spectra for 1 at 10 K and 200 K.**

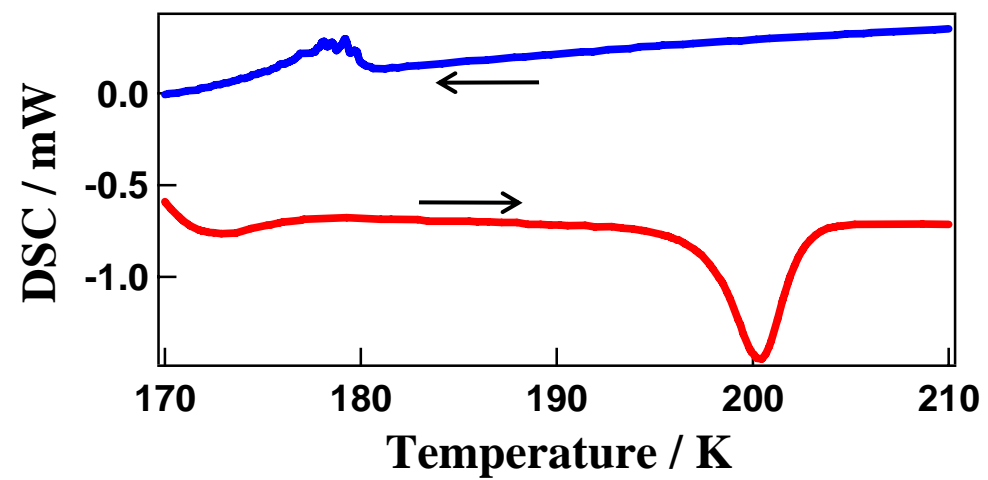

**Figure S2 DSC for 1 at 10 K min<sup>-1</sup>.**

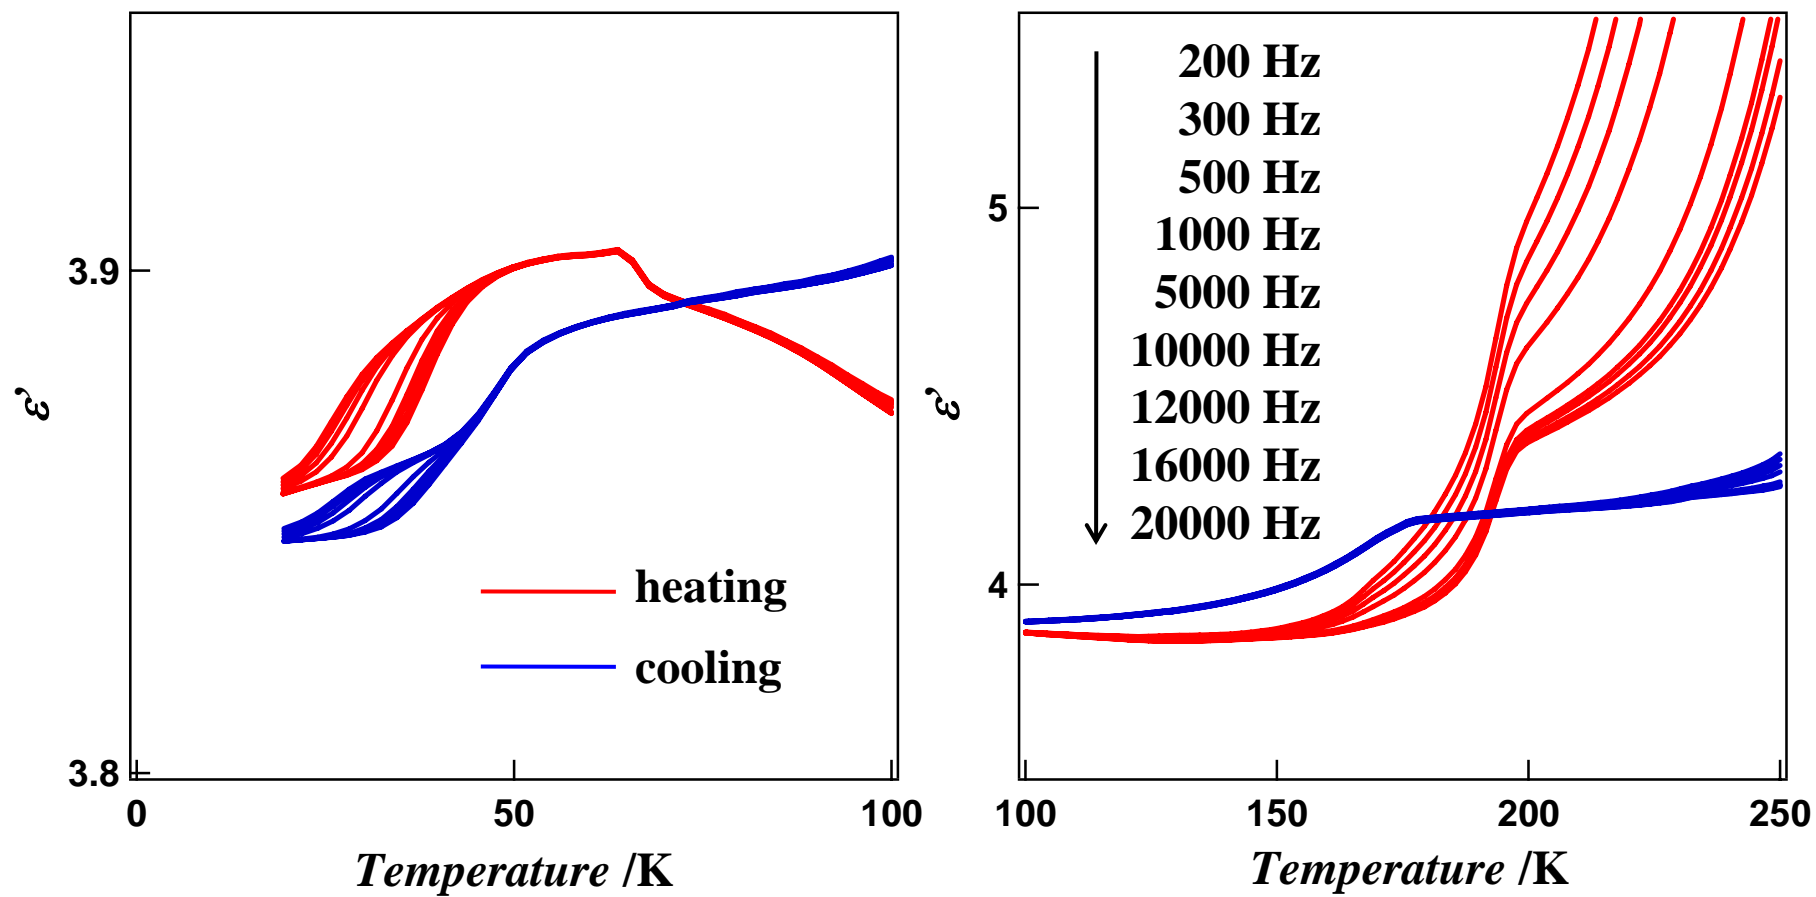

Figure S3 Temperature dependence of dielectric constant.

**Table S1. Selected bond angles for 1.**

|          | LS @ 10 K  | HS1 @ 190 K | HS2 @ 190 K |
|----------|------------|-------------|-------------|
| N1-Co-N2 | 78.17(15)  | 76.18(13)   | 77.75(13)   |
| N1-Co-N3 | 156.47(13) | 152.24(13)  | 156.05(13)  |
| N1-Co-N4 | 97.25(15)  | 99.05(14)   | 93.75(12)   |
| N1-Co-N5 | 106.02(15) | 109.62(13)  | 106.13(13)  |
| N1-Co-N6 | 88.75(15)  | 89.90(14)   | 92.38(13)   |
| N2-Co-N3 | 78.67(15)  | 76.74(13)   | 78.29(12)   |
| N2-Co-N4 | 97.67(13)  | 99.72(14)   | 102.95(13)  |
| N2-Co-N5 | 175.77(18) | 173.70(14)  | 175.77(13)  |
| N2-Co-N6 | 99.99(14)  | 106.37(15)  | 99.57(13)   |
| N3-Co-N4 | 89.92(15)  | 91.37(15)   | 91.54(12)   |
| N3-Co-N5 | 97.19(15)  | 97.73(14)   | 97.81(12)   |
| N3-Co-N6 | 91.18(15)  | 91.94(14)   | 91.61(13)   |
| N4-Co-N5 | 81.34(14)  | 77.22(14)   | 78.66(13)   |
| N4-Co-N6 | 162.17(13) | 153.77(13)  | 157.44(14)  |
| N5-Co-N6 | 80.87(14)  | 76.55(15)   | 78.78(13)   |
